# Supplementary material
Source: PubMed Central journal article supplement (PMC10433996)

## Supplementary figure legend

**Figure S1** Percent of fecal microbial (A) and oral microbial (B) variability explained by each parent estrogen or estrogen metabolite were calculated for beta-diversity estimates from Bray-Curtis, Jaccard, unweighted UniFrac, and weighted UniFrac. The distance-based coefficient of determination ( $R^2$ ) was calculated by Adonis test. The “\*” on top of the bar indicates a p-value less than 0.05 but FDR adjusted p-value greater than 0.05. The “#” on top of the bar indicates an FDR adjusted p-value less than 0.05.

**A****Fecal Microbiome**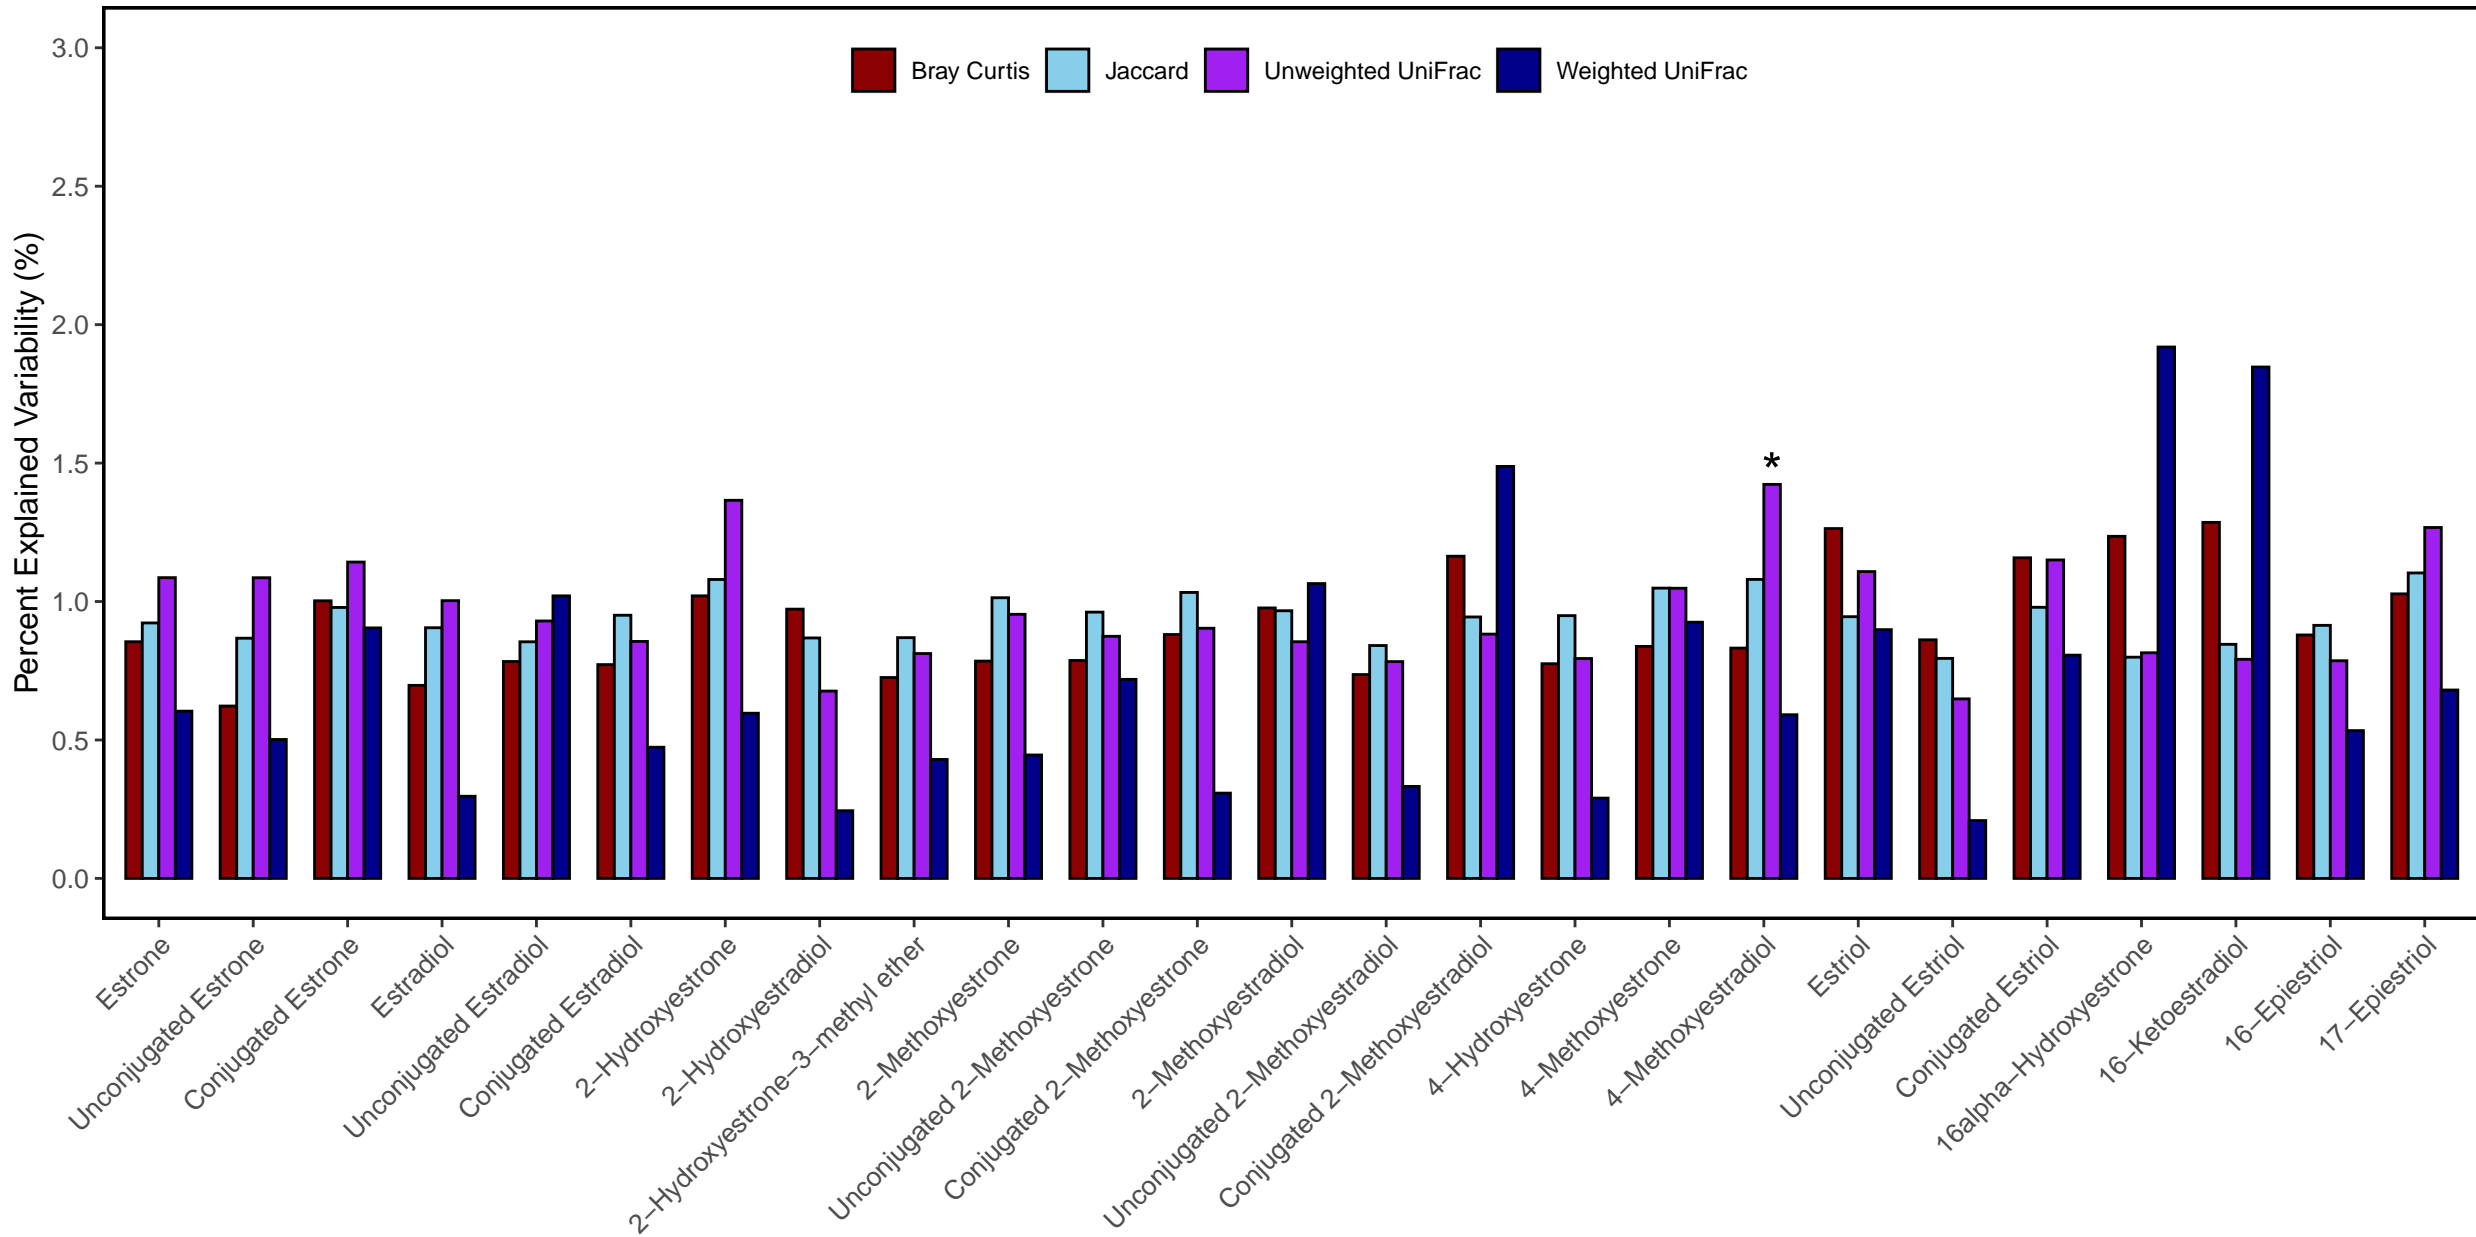**B****Oral Microbiome**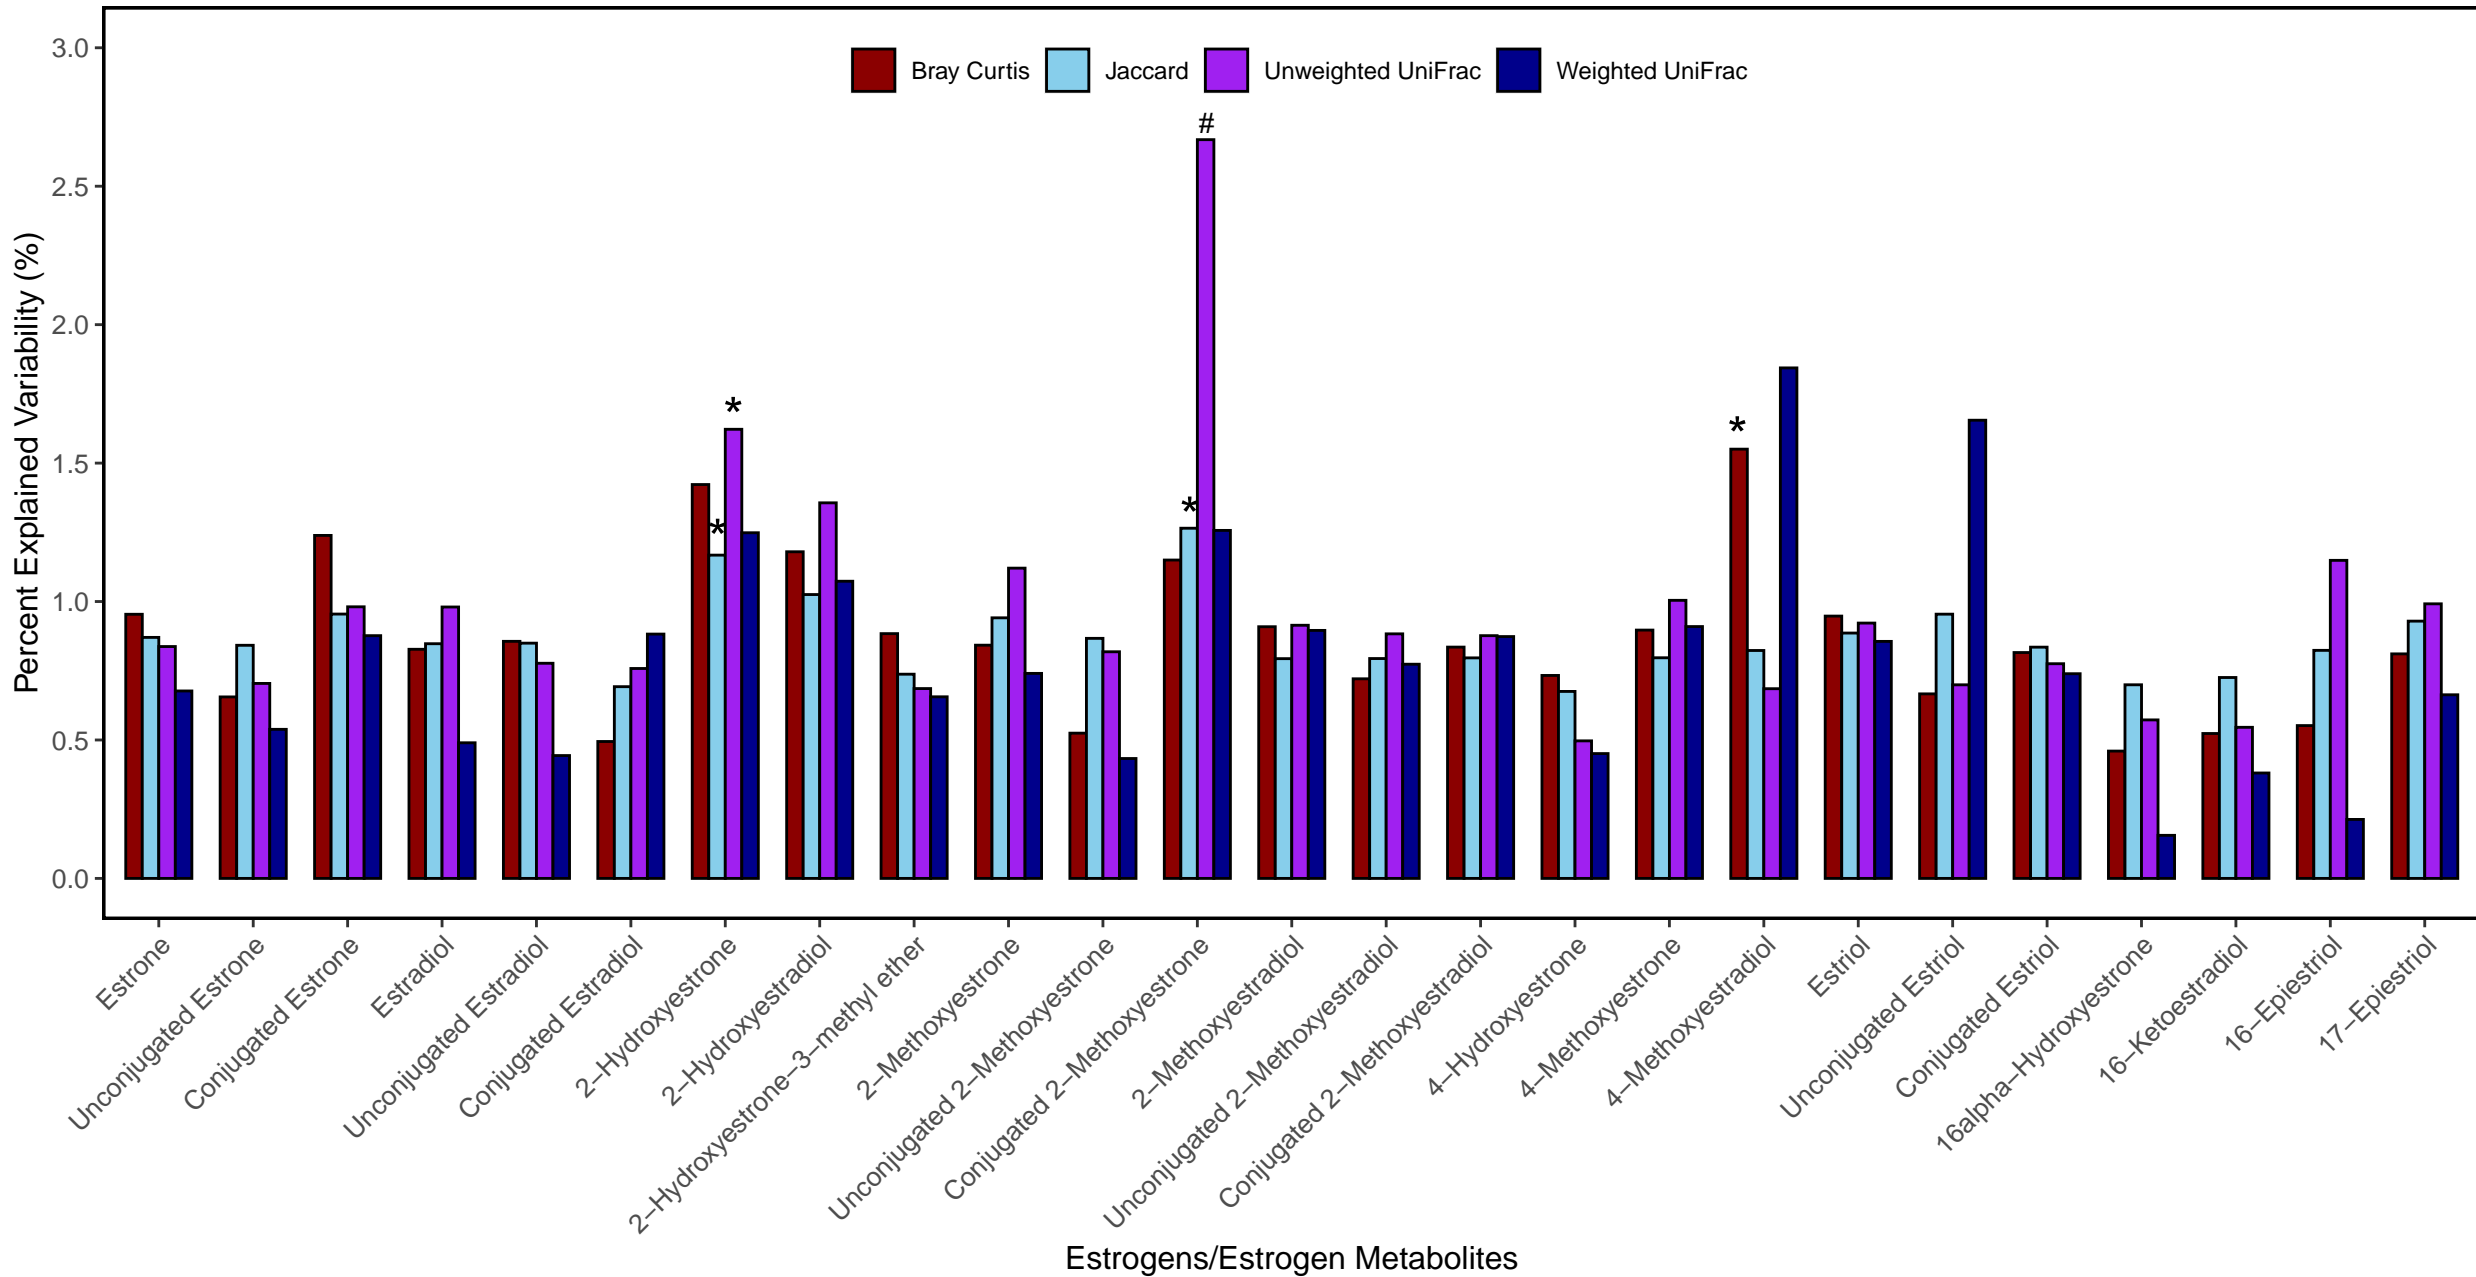

Supplement: spectrum.01572-23-s0001.pdf [file spectrum.01572-23-s0001.pdf]
